# Supplementary material
Source: PubMed Central journal article supplement (PMC3249373)
Supplement: supp_111.134643_TableS1.pdf [file supp_111.134643_TableS1.pdf]

**Table S1 Characteristics of *Ae. speltoides* populations**

| Abbreviation of population | Populations: origin, source                       | Geographical zone, elevation, and coordinates  | Population size, location                    | Morphotype                                   |
|----------------------------|---------------------------------------------------|------------------------------------------------|----------------------------------------------|----------------------------------------------|
| C                          | Cankiri, Turkey <sup>4</sup><br>PI 573448         | Euro-Siberian<br>680 m<br>40°31' N, 33°38' E   | N/A;<br>cultivated field *                   | <i>ssp. ligustica</i>                        |
| An                         | Ankara, Turkey <sup>1</sup><br>PI 573452          | Irano-Turanian<br>575 m<br>36°59' N, 32°56' E  | N/A;<br>cultivated field *                   | <i>ssp. ligustica</i>                        |
| Ar                         | Arbil, Iraq <sup>1</sup><br>PI 219867             | Irano-Turanian<br>570 m<br>36°24' N, 44°08' E  | N/A;<br>uncultivated area *                  | <i>ssp. ligustica</i>                        |
| TS-84                      | Latakia, Syria <sup>3,4</sup><br>PI 487235, TS-84 | Mediterranean<br>200 m<br>35°38' N, 35°59' E   | N/A;<br>uncultivated area *                  | <i>ssp. aucheri</i>                          |
| Ta                         | Tartus, Syria <sup>1</sup><br>PI 487238           | Mediterranean<br>600 m<br>35°07' N, 36°07' E   | N/A;<br>cultivated field *                   | <i>ssp. aucheri</i>                          |
| A                          | Achihood, Israel <sup>4</sup><br>2.16             | Mediterranean<br>45-75 m<br>32°55' N, 35°10' E | big;<br>cultivated field and natural habitat | <i>ssp. ligustica</i><br><i>ssp. aucheri</i> |
| E                          | En-Efek, Israel <sup>4</sup><br>2.37              | Mediterranean<br>16 m<br>32°50' N, 35°06' E    | small;<br>uncultivated area;<br>endangered   | <i>ssp. ligustica</i>                        |

|            |                                    |                      |                                   |                         |
|------------|------------------------------------|----------------------|-----------------------------------|-------------------------|
| Q          | Kishon, Israel <sup>4</sup>        | Mediterranean        | small;                            | <i>ssp. ligustica</i>   |
|            | 2.22                               | 2 m                  | natural habitat                   | <i>ssp. aucheri</i>     |
|            |                                    | 32°48' N; 35°02' E   | endangered                        |                         |
| T0, T2, T5 | Technion-2, Israel <sup>4</sup>    | Mediterranean        | small;                            | <i>ssp. ligustica</i> , |
|            | 2.36                               | 265 m                | natural habitat;                  | <i>ssp. aucheri</i>     |
|            |                                    | 32°46' N, 35°00' E   | extinct                           |                         |
| R          | Ramat Hanadiv, Israel <sup>4</sup> | Mediterranean        | big;                              | <i>ssp. ligustica</i> , |
|            | 2.46                               | 100-125 m            | natural habitat, interrupted area | <i>ssp. aucheri</i> ,   |
|            |                                    | 32°33' N, 34°56' E   |                                   | <i>intermediate</i>     |
| K          | Katzir, Israel <sup>3;4</sup>      | Mediterranean        | big;                              | <i>ssp. aucheri</i>     |
|            | TS 89                              | 233-250 m            | natural habitat                   |                         |
|            |                                    | 32°29' N, 35°05' E   |                                   |                         |
| TS 43      | Givat Koah, Israel <sup>4</sup>    | Mediterranean        | small;                            | intermediate            |
|            | TS 43                              | 75 m                 | uncultivated area;                |                         |
|            |                                    | 32°02' N, 34°58' E * | extinct                           |                         |
| TS 01      | Ashkelon, Israel <sup>3</sup>      | Mediterranean        | N/A;                              | <i>ssp. aucheri</i>     |
|            | TS 01                              | 45 m                 | uncultivated area,                |                         |
|            |                                    | 31°40' N, 34°38' E * | extinct                           |                         |

Source: <sup>1</sup> – USDA, United States Department of Agriculture; <sup>2</sup> – AARI, Aegean Agricultural Research Institute, Turkey; <sup>3</sup> – kindly provided by Prof. M. Feldman, Weizmann Institute collection, Rehovot, Israel; <sup>4</sup> – IE, Institute of Evolution collection, Haifa, Israel; \* - data obtained by Google Earth.
